# Supplementary material
Source: PubMed Central journal article supplement (PMC6764923)
Supplement: NIHMS1523539-supplement-1.pdf [file NIHMS1523539-supplement-1.pdf]

| <b>Supplementary Table 1. Sexual identity differences in healthcare utilization, perceived health, health behaviors, health conditions, and sleep health in men (ages 18-59), National Health and Nutrition Examination Survey 2005-2014 (N=8,030)</b> |             |                           |                |                                        |                     |                                             |                    |                                             |
|--------------------------------------------------------------------------------------------------------------------------------------------------------------------------------------------------------------------------------------------------------|-------------|---------------------------|----------------|----------------------------------------|---------------------|---------------------------------------------|--------------------|---------------------------------------------|
|                                                                                                                                                                                                                                                        |             | Heterosexual<br>(n=7,682) | Gay<br>(n=166) | p-value<br>Heterosexual vs.<br>Gay men | Bisexual<br>(n=118) | p-value<br>Heterosexual vs.<br>Bisexual men | Not sure<br>(n=64) | p-value<br>Heterosexual vs.<br>Not sure men |
| <b>Healthcare utilization</b>                                                                                                                                                                                                                          | Sample size | weighted %/mean (SE)      |                |                                        |                     |                                             |                    |                                             |
| Health insurance coverage                                                                                                                                                                                                                              | 8,029       | 73.7%                     | 85.8%          | <0.001*                                | 70.4%               | 0.43                                        | 46.3%              | <0.001*                                     |
| Routine place of care                                                                                                                                                                                                                                  | 8,030       | 75.9%                     | 80.0%          | 0.25                                   | 77.5%               | 0.76                                        | 59.6%              | 0.01*                                       |
| Number of times received healthcare in past year                                                                                                                                                                                                       | 8,030       |                           |                | 0.34                                   |                     | 0.01*                                       |                    | 0.14                                        |
| None                                                                                                                                                                                                                                                   |             | 26.5%                     | 18.4%          |                                        | 9.3%                |                                             | 43.5%              |                                             |
| 1 time                                                                                                                                                                                                                                                 |             | 23.3%                     | 19.8%          |                                        | 28.4%               |                                             | 25.3%              |                                             |
| 2-3 times                                                                                                                                                                                                                                              |             | 26.3%                     | 29.7%          |                                        | 29.4%               |                                             | 14.8%              |                                             |
| 4-9 times                                                                                                                                                                                                                                              |             | 19.6%                     | 25.4%          |                                        | 22.9%               |                                             | 9.1%               |                                             |
| 10-12 times                                                                                                                                                                                                                                            |             | 3.5%                      | 5.6%           |                                        | 7.8%                |                                             | 7.3%               |                                             |
| More than 13 times                                                                                                                                                                                                                                     |             | 0.8%                      | 1.1%           |                                        | 2.2%                |                                             | 0.0%               |                                             |
| <b>Perceived health</b>                                                                                                                                                                                                                                |             |                           |                |                                        |                     |                                             |                    |                                             |
| General health                                                                                                                                                                                                                                         | 8,026       |                           |                | 0.11                                   |                     | 0.58                                        |                    | <0.001*                                     |
| Excellent                                                                                                                                                                                                                                              |             | 12.5%                     | 13.7%          |                                        | 8.0%                |                                             | 13.3%              |                                             |
| Very good                                                                                                                                                                                                                                              |             | 33.7%                     | 42.1%          |                                        | 32.6%               |                                             | 11.7%              |                                             |
| Good                                                                                                                                                                                                                                                   |             | 39.7%                     | 37.2%          |                                        | 44.6%               |                                             | 36.5%              |                                             |
| Fair                                                                                                                                                                                                                                                   |             | 12.6%                     | 6.0%           |                                        | 14.2%               |                                             | 31.2%              |                                             |
| Poor                                                                                                                                                                                                                                                   |             | 1.5%                      | 1.0%           |                                        | 0.6%                |                                             | 7.3%               |                                             |
| <b>Health behaviors</b>                                                                                                                                                                                                                                |             |                           |                |                                        |                     |                                             |                    |                                             |
| Current tobacco use                                                                                                                                                                                                                                    | 7,776       | 26.7%                     | 31.9%          | 0.28                                   | 36.2%               | 0.08                                        | 10.3%              | 0.01*                                       |
| Average alcoholic drinks per day                                                                                                                                                                                                                       | 7,263       | 3.3 (0.07)                | 2.5 (0.23)     | 0.01*                                  | 3.2(0.51)           | 0.89                                        | 3.9 (0.58)         | 0.24                                        |
| Meets physical activity guidelines                                                                                                                                                                                                                     | 7,598       | 58.1%                     | 53.2%          | 0.29                                   | 59.7%               | 0.83                                        | 42.3%              | 0.09                                        |
| <b>Health conditions</b>                                                                                                                                                                                                                               |             |                           |                |                                        |                     |                                             |                    |                                             |
| Mean number of health conditions                                                                                                                                                                                                                       | 7,425       | 1.4 (0.03)                | 1.5 (0.17)     | 0.51                                   | 1.9 (0.23)          | 0.02*                                       | 0.9 (0.20)         | 0.02*                                       |
| <b>Sleep health</b>                                                                                                                                                                                                                                    |             |                           |                |                                        |                     |                                             |                    |                                             |
| Use of prescription sleep medication and/or sedatives                                                                                                                                                                                                  | 8,030       | 7.8%                      | 10.2%          | 0.39                                   | 7.8%                | 0.99                                        | 8.2%               | 0.94                                        |
| Sleep duration                                                                                                                                                                                                                                         | 8,027       |                           |                | 0.03*                                  |                     | 0.76                                        |                    | 0.07                                        |
| Short sleep (≤6 hours)                                                                                                                                                                                                                                 |             | 40.2%                     | 31.4%          |                                        | 41.9%               |                                             | 22.7%              |                                             |
| Adequate sleep (7-8 hours)                                                                                                                                                                                                                             |             | 55.1%                     | 60.4%          |                                        | 52.3%               |                                             | 73.5%              |                                             |
| Long sleep (≥ 9 hours)                                                                                                                                                                                                                                 |             | 4.7%                      | 8.2%           |                                        | 5.8%                |                                             | 3.8%               |                                             |
| Ever told a health professional you had trouble sleeping                                                                                                                                                                                               | 8,030       | 20.3%                     | 29.0%          | 0.06                                   | 24.3%               | 0.37                                        | 12.0%              | 0.27                                        |
| Ever told by a health professional you have a sleeping disorder                                                                                                                                                                                        | 8,030       | 8.1%                      | 8.9%           | 0.75                                   | 12.1%               | 0.23                                        | 2.0%               | 0.03*                                       |

Note. Reference group = same-sex heterosexual participants; \* denotes  $p < 0.05$

| <b>Supplementary Table 2. Sexual identity differences in healthcare utilization, perceived health, health behaviors, health conditions, and sleep health in women (ages 18-59), National Health and Nutrition Examination Survey 2005-2014 (N=8,302)</b> |                |                           |                    |                                              |                     |                                               |                     |                                               |
|----------------------------------------------------------------------------------------------------------------------------------------------------------------------------------------------------------------------------------------------------------|----------------|---------------------------|--------------------|----------------------------------------------|---------------------|-----------------------------------------------|---------------------|-----------------------------------------------|
|                                                                                                                                                                                                                                                          |                | Heterosexual<br>(n=7,699) | Lesbian<br>(n=107) | p-value<br>Heterosexual vs.<br>Lesbian women | Bisexual<br>(n=342) | p-value<br>Heterosexual vs.<br>Bisexual women | Not sure<br>(n=154) | p-value<br>Heterosexual vs.<br>Not sure women |
| <b>Healthcare utilization</b>                                                                                                                                                                                                                            | Sample<br>size | weighted %/mean (SE)      |                    |                                              |                     |                                               |                     |                                               |
| Health insurance coverage                                                                                                                                                                                                                                | 8,302          | 81.4%                     | 70.0%              | 0.02*                                        | 69.4%               | <0.001*                                       | 55.1%               | <0.001*                                       |
| Routine place of care                                                                                                                                                                                                                                    | 8,302          | 88.2%                     | 83.5%              | 0.17                                         | 83.5%               | 0.06                                          | 76.4%               | <0.001*                                       |
| Number of times received healthcare in<br>past year                                                                                                                                                                                                      | 8,302          |                           |                    | 0.92                                         |                     | 0.20                                          |                     | <0.001*                                       |
| None                                                                                                                                                                                                                                                     |                | 11.2%                     | 15.1%              |                                              | 9.4%                |                                               | 30.4%               |                                               |
| 1 time                                                                                                                                                                                                                                                   |                | 18.0%                     | 19.0%              |                                              | 18.1%               |                                               | 19.6%               |                                               |
| 2-3 times                                                                                                                                                                                                                                                |                | 30.5%                     | 29.5%              |                                              | 24.4%               |                                               | 17.7%               |                                               |
| 4-9 times                                                                                                                                                                                                                                                |                | 29.9%                     | 25.8%              |                                              | 36.7%               |                                               | 19.8%               |                                               |
| 10-12 times                                                                                                                                                                                                                                              |                | 8.3%                      | 8.7%               |                                              | 8.7%                |                                               | 9.9%                |                                               |
| More than 13 times                                                                                                                                                                                                                                       |                | 2.1%                      | 1.9%               |                                              | 2.7%                |                                               | 2.6%                |                                               |
| <b>Perceived health</b>                                                                                                                                                                                                                                  |                |                           |                    |                                              |                     |                                               |                     |                                               |
| General health                                                                                                                                                                                                                                           | 8,294          |                           |                    | 0.12                                         |                     | <0.001*                                       |                     | 0.05*                                         |
| Excellent                                                                                                                                                                                                                                                |                | 11.1%                     | 10.1%              |                                              | 5.6%                |                                               | 13.2%               |                                               |
| Very good                                                                                                                                                                                                                                                |                | 36.0%                     | 23.8%              |                                              | 27.0%               |                                               | 21.8%               |                                               |
| Good                                                                                                                                                                                                                                                     |                | 37.7%                     | 41.4%              |                                              | 47.4%               |                                               | 42.3%               |                                               |
| Fair                                                                                                                                                                                                                                                     |                | 12.8%                     | 18.9%              |                                              | 16.9%               |                                               | 17.2%               |                                               |
| Poor                                                                                                                                                                                                                                                     |                | 2.4%                      | 5.8%               |                                              | 3.1%                |                                               | 5.5%                |                                               |
| <b>Health behaviors</b>                                                                                                                                                                                                                                  |                |                           |                    |                                              |                     |                                               |                     |                                               |
| Current tobacco use                                                                                                                                                                                                                                      | 8,076          | 20.7%                     | 39.6%              | <0.001*                                      | 41.7%               | <0.001*                                       | 19.4%               | 0.71                                          |
| Average alcoholic drinks per day                                                                                                                                                                                                                         | 6,763          | 2.0 (0.04)                | 2.7 (0.25)         | 0.01*                                        | 3.0 (0.17)          | <0.001*                                       | 2.0 (0.23)          | 0.73                                          |
| Meets physical activity guidelines                                                                                                                                                                                                                       | 7,796          | 41.5%                     | 47.0%              | 0.41                                         | 43.9%               | 0.52                                          | 35.1%               | 0.31                                          |
| <b>Health conditions</b>                                                                                                                                                                                                                                 |                |                           |                    |                                              |                     |                                               |                     |                                               |
| Mean number of health conditions                                                                                                                                                                                                                         | 7,782          | 1.6 (0.03)                | 2.1 (0.20)         | 0.02*                                        | 1.9 (0.10)          | 0.03*                                         | 1.9 (0.16)          | 0.09                                          |
| <b>Sleep health</b>                                                                                                                                                                                                                                      |                |                           |                    |                                              |                     |                                               |                     |                                               |
| Use of prescription sleep medication and/or<br>sedatives                                                                                                                                                                                                 | 8,302          | 8.6%                      | 15.6%              | 0.04*                                        | 16.6%               | <0.001*                                       | 11.0%               | 0.46                                          |
| Sleep duration                                                                                                                                                                                                                                           | 8,300          |                           |                    | 0.69                                         |                     | <0.001*                                       |                     | 0.10                                          |
| Short sleep (≤6 hours)                                                                                                                                                                                                                                   |                | 35.6%                     | 39.0%              |                                              | 45.6%               |                                               | 38.9%               |                                               |
| Adequate sleep (7-8 hours)                                                                                                                                                                                                                               |                | 57.3%                     | 52.8%              |                                              | 44.8%               |                                               | 49.5%               |                                               |
| Long sleep (≥ 9 hours)                                                                                                                                                                                                                                   |                | 7.1%                      | 8.2%               |                                              | 9.6%                |                                               | 11.6%               |                                               |
| Ever told a health professional you had<br>trouble sleeping                                                                                                                                                                                              | 8,302          | 28.1%                     | 38.7%              | 0.06                                         | 40.4%               | <0.001*                                       | 20.4%               | 0.08                                          |
| Ever told by a health professional you have<br>a sleeping disorder                                                                                                                                                                                       | 8,302          | 7.1%                      | 13.5%              | 0.08                                         | 14.8%               | <0.001*                                       | 7.6%                | 0.78                                          |

Note. Reference group = same-sex heterosexual participants; \* denotes  $p < 0.05$
